# Supplementary material for: Efficient and flexible tagging of endogenous genes by homology-independent intron targeting
Source: PubMed Central journal article supplement — Genome Res. 2019 Aug;29(8):1322–8. doi: 10.1101/gr.246413.118 (PMC6673721; doi:10.1101/gr.246413.118), 2019-08
Supplement: supp_gr.246413.118_Supplemental_Material_1.pdf [file supp_gr.246413.118_Supplemental_Material_1.pdf]

## SUPPLEMENTAL MATERIAL

### **Efficient and flexible tagging of endogenous genes by homology-independent intron targeting**

Yevgeniy V Serebrenik<sup>1,2,\*</sup>, Stephanie E Sansbury<sup>1,2,\*</sup>, Saranya Santhosh Kumar<sup>1,2</sup>, Jorge Henao-Mejia<sup>3,4,5</sup> and Ophir Shalem<sup>1,2,†</sup>

<sup>1</sup> Center for Cellular and Molecular Therapeutics, Children's Hospital of Philadelphia, Philadelphia, PA 19104, USA

<sup>2</sup> Department of Genetics, Perelman School of Medicine, University of Pennsylvania, Philadelphia, PA 19104, USA

\* Equal contribution

† Correspondence: shalemo@upenn.edu

## Detailed protocol for generating and isolating fluorescent cell clones by homology-independent intron targeting

### Materials and Reagents

- HEK293 cells (ATCC CRL-1573)
  - Can also work with (but not limited to) HeLa cells, H9 hESCs, or HAP1 cells.
- Cell culture reagents (Thermo Fischer Scientific): DMEM, trypsin, Opti-MEM
- Transfection-grade PEI (Polysciences, cat. #24765)
- Plasmid encoding generic fluorescent tag donor
  - Any vector can work as long as it contains the sequences listed in Supplemental Tables S1 and S2.
  - Consider whether the tag will be spliced in-frame with the coding sequence; if not, use a donor with the appropriate frameshift mutations on either end.
- Plasmid encoding validated target sgRNA
  - The appropriate spacer sequences can be cloned into the lentiGuide-Puro plasmid (Addgene #52963). sgRNA sequences can be chosen using the sgRNA designer provided by the Broad institute (<https://portals.broadinstitute.org/gpp/public/analysis-tools/sgrna-design>).
- Plasmid encoding sgRNA against donor
  - See Supplemental Table S3 for the utilized spacer sequence.
- Plasmid encoding Cas9
  - Can be used separately, such as on the lentiCas9-Blast plasmid (Addgene #53962), or included on the sgRNA plasmids (e.g. Addgene #52961).

### Equipment

- Cell sorter (BD FACSAria Fusion or any other similar cell sorter)
- Flow cytometry tubes (12 × 75 mm)
- Cell Straining Kit (70 μm)
- Cell culture plates (12-well plate, 10 cm dish, 96-well plate)
- Cell culture incubator (37°C, 5% CO<sub>2</sub>)

### Procedure

#### Day 1: Plate cells

- 1) Plate HEK293 cells into at least 2 wells of a 12-well plate, such that they will be 60-80% confluent on the following day (160-200 × 10<sup>3</sup> cells/well).

#### Day 2: Transfect cells

- 2) To 100 μl Opti-MEM, add plasmids encoding the generic donor, the donor sgRNA, the target sgRNA, and Cas9 in a 5:1:1:1 molar ratio, respectively. A total amount of 1360 ng of plasmid DNA is mixed with 4.08 μl PEI (1 μg DNA : 3 μl PEI ratio).
- 3) An additional reaction with PEI reagent only is used as the “mock” transfection.
- 4) Vortex and incubate transfection mixtures for at least 15 minutes.
- 5) Add each mixture dropwise to a single well of a 12-well plate.

#### Day 3: Wash and replat cells

- 6) Trypsinize cells in 100 μl trypsin, resuspend in 500 μl DMEM, and transfer entire cell suspensions to a 10 cm dish containing 10 ml DMEM.

#### Day 7-8: Analyze and sort cells

- 7) Prepare a 96-well plate filled with 100 μl DMEM per well. Store in cell culture incubator.

- 8) Trypsinize cells in 1 ml trypsin and resuspend in 2.5 ml DMEM.
- 9) Pass cell suspension through a cell strainer into a flow cytometry tube (this step is important to prevent clogs in the flow cytometer). Place tube immediately on ice.
- 10) Initialize cell sorter according to the manufacturer's protocol. Set up gates to differentiate between the "mock"- and truly-transfected cells.
- 11) Sort single fluorescent cells directly into a 96-well plate. Place immediately in cell culture incubator to grow and expand.

> pMC-mNG2<sub>11</sub>

*vector* –

CCACACGAAATCGATTGCTCTTCTAATCTCCTCTCTTCTCCTCTCTCCAG[ ]GGTGGCTCT  
GGAAGTTCAGGTGGAGGCTCGGGTGGCGGCAGTTCGACCGAGCTCAACTTCAAGGAGTG  
GCAAAGGCCCTTTACCGATATGATGGGATCCGGAAGTGGCTCAAGCGGAGGAGGAAGTAG  
TGGAAGTTC[ ]GTAAGTATTGGTTAAGAGCGAATCGATTTCTGAGG

– *vector*

> pMC-mClover3

*vector* –

CCACACGAAATCGATTGCTCTTCTAATCTCCTCTCTTCTCCTCTCTCCAG[ ]GGTGGCTCT  
GGAAGTTCAGGTGGAGGCTCGGGTGGCGGCAGTTCGGTGAGCAAGGGCGAGGAGCTGTT  
CACCGGGGTGGTGCCCATCTGGTCGAGCTGGACGGCGACGTAAACGGCCACAAGTTCA  
GCGTCCGCGGCGAGGGCGAGGGCGATGCCACCAACGGCAAGCTGACCCTGAAGTTCATC  
TGCACCACCGGCAAGCTGCCCGTGCCCTGGCCACCCTCGTGACCACCTTCGGCTACGG  
CGTGGCCTGCTTCAGCCGCTACCCCGACCACATGAAGCAGCACGACTTCTTCAAGTCCGC  
CATGCCCGAAGGCTACGTCCAGGAGCGCACCATCTCTTTCAAGGACGACGGTACCTACAA  
GACCCGCGCCGAGGTGAAGTTCGAGGGCGACACCCTGGTGAACCGCATCGAGCTGAAGG  
GCATCGACTTCAAGGAGGACGGCAACATCCTGGGGCACAAAGCTGGAGTACAACCTCAACA  
GCCACTACGTCTATATCACGGCCGACAAGCAGAAGAACTGCATCAAGGCTAACTTCAAGAT  
CCGCCACAACGTTGAGGACGGCAGCGTGACGCTCGCCGACCACTACCAGCAGAACACCC  
CCATCGGCGACGGCCCCGTGCTGCTGCCCGACAACCACTACCTGAGCCATCAGTCCAAG  
CTGAGCAAAGACCCCAACGAGAAGCGCGATCACATGGTCCTGCTGGAGTTCGTGACCGCC  
GCCGGGATTACACATGGCATGGACGAGCTGTACAAGGGATCCGGAAGTGGCTCAAGCGG  
AGGAGGAAGTAGTGGAAGTTC[ ]GTAAGTATTGGTTAAGAGCGAATCGATTTCTGAGG

– *vector*

**Supplemental Table S1.** DNA sequences of the mNG2<sub>11</sub> and mClover3 donor regions in the pMC-mNG2<sub>11</sub> and pMC-mClover3 plasmids. The donor plasmid protospacer sequence is highlighted red. Linker regions are highlighted blue. The sequence of mNG2<sub>11</sub> or mClover3 is highlighted green. Splice sites are in black and directly adjacent to the sequences incorporated into the coding sequence. Blue brackets (“[ ]”) indicate locations where additional nucleotides should be added to change the frame of the tag.

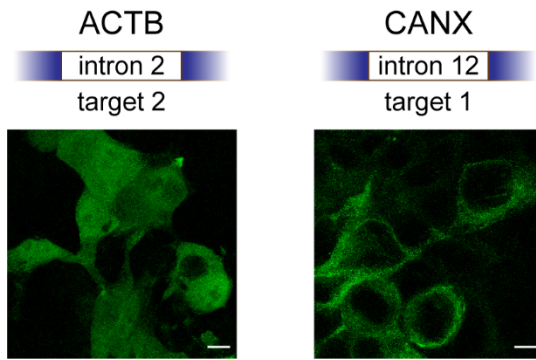

**Supplemental Figure S1.** Additional intronic tagging locations for *ACTB* and *CANX*. Microscopy images of HEK293 cells stably expressing mNG2<sub>1-10</sub> tagged with mNG2<sub>11</sub> targeting the indicated genomic sites. Images are maximum projections of z-stacks and scale bars correspond to 10  $\mu$ m.

> pMC-mNG2<sub>11</sub>-BSD(-)

*vector* –

CCACACGAAATCGATTGCTCTTAATCTCCTCTCTTCTCCTCTCTCCAG [ ]GGTGGCTCT  
GGAAGTTCAGGTGGAGGCTCGGGTGGCGGCAGTTCGACCGAGCTCAACTTCAAGGAGTG  
GCAAAGGCCTTTACCGATATGATGGGATCCGGAAGTGGCTCAAGCGGAGGAGGAAGTAG  
TGGAAGTTC [ ]GTAAGTATTGGTGCAGTGAAAAAATGCTTTATTTGTGAAATTTGTGATGC  
TATTGCTTTATTTGTAACCATTATAAGCTGCAATAAACAAGTTAACAACAACAATTGCATTCA  
TTTTATGTTTCAGGTTTCAGGGGGAGGTGTGGGAGGTTTTTTAAAGCAAGTAAAACCTCTAC  
AAATGTGGTATGGCTGATTATGATCCTCTGGAGATTTAGCCCTCCACACATAACCAGAGG  
GCAGCAATTCACGAATCCCAACTGCCGTCCGGCTGTCCATCACTGTCCTTCACTATGGCTTT  
GATCCCAGGATGCAGATCGAGAAGCACCTGTCCGGCACCCTCCGCAGGGGCTCAAGATGC  
CCCTGTTCTCATTTCCGATCGCGACGATACAAGTCAGGTTGCCAGCTGCCGCAGCAGCAG  
CAGTGCCCAGCACCACGAGTTCTGCACAAGGTCCCCCAGTAAATGATATACATTGACACC  
AGTGAAGATGCGGCCGTGCTAGAGAGAGCTGCGCTGGCGACGCTGTAGTCTTCAGAGAT  
GGGGATGCTGTTGATTGTAGCCGTTGCTCTTTCAATGAGGGTGGATTCTTCTTGAGACAAA  
GGCTTGGCCATGGTGGCGGATCCCGCGTCACGACACCTGTGTTCTGGCGGCAAACCCGT  
TGCGAAAAAGAACGTTACGGCGACTACTGCACTTATATACGGTTCTCCCCACCCTCGGG  
AAAAAGGCGGAGCCAGTACACGACATCACTTTCCAGTTTACCCCGCGCCACCTTCTCTAG  
GCACCGGTTCAATTGCCGACCCCTCCCCCAACTTCTCGGGGACTGTGGGCGATGTGCGC  
TCTGCCACTGACGGGCACCGGAGCCTAAGAGCGAATCGATTTCGTGAGG

– *vector*

> pMC-mNG2<sub>11</sub>-BSD(+)

*vector* –

CCACACGAAATCGATTGCTCTTAATCTCCTCTCTTCTCCTCTCTCCAG [ ]GGTGGCTCT  
GGAAGTTCAGGTGGAGGCTCGGGTGGCGGCAGTTCGACCGAGCTCAACTTCAAGGAGTG  
GCAAAGGCCTTTACCGATATGATGGGATCCGGAAGTGGCTCAAGCGGAGGAGGAAGTAG  
TGGAAGTTC [ ]GTAAGTATTGGTGGCTCCGGTGCCCGTCAGTGGGCAGAGCGCACATCG  
CCCACAGTCCCCGAGAAGTTGGGGGGAGGGGTCCGGCAATTGAACCGGTGCCTAGAGAAG  
GTGGCGCGGGGTAAACTGGGAAAGTGATGTCGTGACTGGCTCCGCCTTTTTCCCGAGGG  
TGGGGGAGAACCGTATATAAGTGCAAGTAGTCGCCGTGAACGTTCTTTTTCGCAACGGGTTT  
GCCGCCAGAACACAGGTGTGCTGACGCGGGATCCGCCACCATGGCCAAGCCTTTGTCTCA  
AGAAGAATCCACCCTCATTGAAAGAGCAACGGCTACAATCAACAGCATCCCCATCTCTGAA  
GACTACAGCGTCGCCAGCGCAGCTCTCTCTAGCGACGGCCGCATCTTCACTGGTGTCAAT  
GTATATCATTTTACTGGGGGACCTTGTGCAGAACTCGTGGTGTGCTGGGCACTGCTGCTGCT  
GCGGCAGCTGGCAACCTGACTTGTATCGTCGCGATCGGAAATGAGAACAGGGGCATCTTG  
AGCCCCTGCGGACGGTGCCGACAGGTGCTTCTCGATCTGCATCCTGGGATCAAAGCCATA  
GTGAAGGACAGTGATGGACAGCCGACGGCAGTTGGGATTCGTGAATTGCTGCCCTCTGGT  
TATGTGTGGGAGGGCTAAATCTCCAGAGGATCATAATCAGCCATACCACATTTGTAGAGGT  
TTTACTTGCTTTAAAAACCTCCACACCTCCCCCTGAACCTGAAACATAAAATGAATGCAA  
TTGTTGTGTTAACTTGTATTGTCAGCTTATAATGGTTACAAATAAAGCAATAGCATCACAA  
ATTTACAAATAAAGCATTTTTTTCACTGCTAAGAGCGAATCGATTTCGTGAGG

– *vector*

> pMC-mClover3-BSD(-)

*vector* –

CCACACGAAATCGATTGCTCTTAATCTCCTCTCTTCTCCTCTCTCCAG [ ]GGTGGCTCT  
GGAAGTTCAGGTGGAGGCTCGGGTGGCGGCAGTTCGGTGAGCAAGGGCGAGGAGCTGTT  
CACCGGGTGGTGCCCATCTGGTCGAGCTGGACGGCGACGTAACGGCCACAAGTTCA

GCGTCCGCGGGCGAGGGCGAGGGCGATGCCACCAACGGCAAGCTGACCCTGAAGTTCATC  
TGCACCACCGGCAAGCTGCCCGTGCCCTGGCCACCCTCGTGACCACCTTCGGCTACGG  
CGTGGCCTGCTTCAGCCGCTACCCCGACCACATGAAGCAGCACGACTTCTTCAAGTCCGC  
CATGCCCGAAGGCTACGTCCAGGAGCGCACCATCTCTTTCAAGGACGACGGTACCTACAA  
GACCCGCGCCGAGGTGAAGTTCGAGGGCGACACCCTGGTGAACCGCATCGAGCTGAAGG  
GCATCGACTTCAAGGAGGACGGCAACATCCTGGGGCACAAGCTGGAGTACAATTCAACA  
GCCACTACGTCTATATCACGGCCGACAAGCAGAAGAAGTGCATCAAGGCTAACTTCAAGAT  
CCGCCACAACGTTGAGGACGGCAGCGTGCAGCTCGCCGACCACTACCAGCAGAACACCC  
CCATCGGCGACGGCCCCGTGCTGCTGCCCGACAACCACTACCTGAGCCATCAGTCCAAG  
CTGAGCAAAGACCCCAACGAGAAGCGCGATCACATGGTCCTGCTGGAGTTCGTGACCGCC  
GCCGGGATTACACATGGCATGGACGAGCTGTACAAGGGATCCGGAAGTGGCTCAAGCGG  
AGGAGGAAGTAGTGGAAGTTCT]GTAAGTATTGGTGCAGTGAAAAAATGCTTTATTTGTG  
AAATTTGTGATGCTATTGCTTTATTTGTAACCATTATAAGCTGCAATAAACAAGTTAACAACA  
ACAATTGCATTCATTTTATGTTTCAGGTTTCAGGGGGAGGTGTGGGAGGTTTTTTAAAGCAA  
GTAAAACCTCTACAAATGTGGTATGGCTGATTATGATCCTCTGGAGATTTAGCCCTCCCACA  
CATAACCAGAGGGCAGCAATTCACGAATCCCAACTGCCGTCCGCTGTCCATCACTGTCTT  
CACTATGGCTTTGATCCCAGGATGCAGATCGAGAAGCACCTGTCCGCACCGTCCGCAGGG  
GCTCAAGATGCCCTGTTCTCATTTCCGATCGCGACGATACAAGTCAGGTTGCCAGCTGCC  
GCAGCAGCAGCAGTGCCAGCACACGAGTTCTGCACAAGGTCCCCAGTAAAATGATAT  
ACATTGACACCAGTGAAGATGCGGCCGTGCTAGAGAGAGCTGCGCTGGCGACGCTGTA  
GTCTTCAGAGATGGGGATGCTGTTGATTGTAGCCGTTGCTCTTTCAATGAGGGTGGATTCT  
TCTTGAGACAAAGGCTTGGCCATGGTGGCGGATCCCGCGTCACGACACCTGTGTTCTGGC  
GGCAAACCCGTTGCGAAAAAGAAGTTCACGGCGACTACTGCACTTATATACGTTTCTCCC  
CCACCCTCGGGAAAAAGGCGGAGCCAGTACACGACATCACTTTCCAGTTTACCCCGCGC  
CACCTTCTCTAGGCACCGTTCAATTGCCGACCCCTCCCCCAACTTCTCGGGGACTGTG  
GGCGATGTGCGCTCTGCCACTGACGGGCACCGGAGCCTAAGAGCGAATCGATTTCTGTG  
AGG  
– vector

> pMC-mClover3-BSD(+)

vector –

CCACACGAAATCGATTCGCTCTTCTAATCTCCTCTCTTCTCCTCTCTCCAG]GGTGGCTCT  
GGAAGTTCAGGTGGAGGCTCGGGTGGCGGCAGTTCGGTGAGCAAGGGCGAGGAGCTGTT  
CACCGGGGTGGTGCCCATCCTGGTCGAGCTGGACGGCGACGTAAACGGCCACAAGTTCA  
GCGTCCGCGGGCGAGGGCGAGGGCGATGCCACCAACGGCAAGCTGACCCTGAAGTTCATC  
TGCACCACCGGCAAGCTGCCCGTGCCCTGGCCACCCTCGTGACCACCTTCGGCTACGG  
CGTGGCCTGCTTCAGCCGCTACCCCGACCACATGAAGCAGCACGACTTCTTCAAGTCCGC  
CATGCCCGAAGGCTACGTCCAGGAGCGCACCATCTCTTTCAAGGACGACGGTACCTACAA  
GACCCGCGCCGAGGTGAAGTTCGAGGGCGACACCCTGGTGAACCGCATCGAGCTGAAGG  
GCATCGACTTCAAGGAGGACGGCAACATCCTGGGGCACAAGCTGGAGTACAATTCAACA  
GCCACTACGTCTATATCACGGCCGACAAGCAGAAGAAGTGCATCAAGGCTAACTTCAAGAT  
CCGCCACAACGTTGAGGACGGCAGCGTGCAGCTCGCCGACCACTACCAGCAGAACACCC  
CCATCGGCGACGGCCCCGTGCTGCTGCCCGACAACCACTACCTGAGCCATCAGTCCAAG  
CTGAGCAAAGACCCCAACGAGAAGCGCGATCACATGGTCCTGCTGGAGTTCGTGACCGCC  
GCCGGGATTACACATGGCATGGACGAGCTGTACAAGGGATCCGGAAGTGGCTCAAGCGG  
AGGAGGAAGTAGTGGAAGTTCT]GTAAGTATTGGTGGCTCCGGTGCCTGTCAGTGGGCA  
GAGCGCACATCGCCACAGTCCCCGAGAAGTTGGGGGGAGGGGTCCGGCAATTGAACCGG  
TGCCTAGAGAAGGTGGCGCGGGGTAAACTGGGAAAGTGATGTGCTGTAAGTGGCTCCGCCT  
TTTTCCCAGGGTGGGGGAGAACCGTATATAAGTGCAAGTGCAGTAGTCCCGTGAACGTTCTTTT  
CGCAACGGGTTTGGCGCCAGAACACAGGTGTGCTGACGCGGGATCCGCCACCATGGCCA

AGCCTTTGTCTCAAGAAGAATCCACCCTCATTGAAAGAGCAACGGCTACAATCAACAGCAT  
CCCCATCTCTGAAGACTACAGCGTCGCCAGCGCAGCTCTCTCTAGCGACGGCCGCATCTT  
CACTGGTGTCAATGTATATCATTTTACTGGGGGACCTTGTGCAGAACTCGTGGTGTGGGC  
ACTGCTGCTGCTGCGGCAGCTGGCAACCTGACTTGTATCGTCGCGATCGGAAATGAGAAC  
AGGGGCATCTTGAGCCCCTGCGGACGGTGCCGACAGGTGCTTCTCGATCTGCATCCTGG  
GATCAAAGCCATAGTGAAGGACAGTGATGGACAGCCGACGGCAGTTGGGATTCGTGAATT  
GCTGCCCTCTGGTTATGTGTGGGAGGGCTAAATCTCCAGAGGATCATAATCAGCCATACCA  
CATTTGTAGAGGTTTTACTTGCTTTAAAAAACCTCCCACACCTCCCCCTGAACCTGAAACAT  
AAAATGAATGCAATTGTTGTTGTTAACTTGTTTATTGCAGCTTATAATGGTTACAAATAAAGC  
AATAGCATCACAAATTTACAAATAAAGCATTTTTTTTCACTGCTAAGAGCGAATCGATTCGT  
GAGG  
– vector

**Supplemental Table S2.** DNA sequences of the mNG2<sub>11</sub>- and mClover3- BSD(-) and BSD(+) donor regions. The donor plasmid protospacer sequence is highlighted red. Linker regions are highlighted blue. The sequences of mNG2<sub>11</sub> and mClover3 are highlighted green, and the blasticidin resistance gene (BSD), EF1a promoter, and SV40 poly(A) sequence are highlighted orange. Splice sites are in black and directly adjacent to the sequences incorporated into the coding sequence. Blue brackets (“ ”) indicate locations where additional nucleotides should be added to change the frame of the tag.



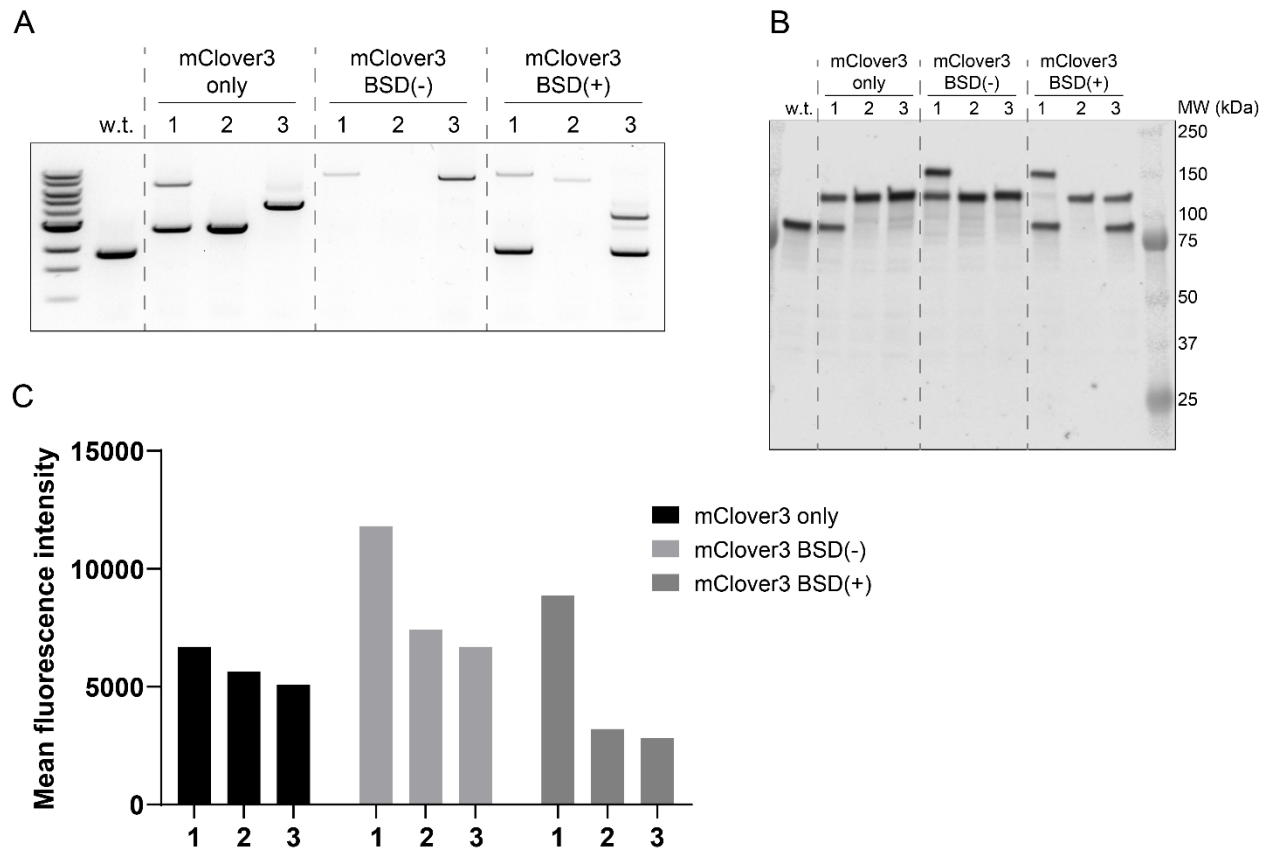

**Supplemental Figure S2.** Clonal HAP1 cells tagged with mClover3-only or mClover3-BSD(-/+) at *CANX* intron 14, sgRNA target 1. **(A)** PCR analysis of the targeted *CANX* locus. Wild-type locus is 1921 bp; tagging with mClover3-only or -BSD(-/+) adds multiples of 881 or 1734 bp, respectively (ladder is NEB 1kb N3232). **(B)** Uncropped Western blot of *CANX* from Figure 3E. Molecular weight (MW) of ladder is indicated. **(C)** Mean fluorescence intensities of mClover3-tagged HAP1 clones measured by flow cytometry.

| Gene          | Intron | Target | Spacer sequence       |
|---------------|--------|--------|-----------------------|
| <i>VIM</i>    | 8      | n/a    | CACTAGACTACCTCAATATG  |
| <i>CBX1</i>   | 3      | 1      | TTGGAGTGATTATTCATCAA  |
| <i>CBX1</i>   | 3      | 2      | TTAGTCCTGAAATCTTAGGT  |
| <i>ACTB</i>   | 2      | 1      | CCCCACCCCGGAAACCGGG   |
| <i>ACTB</i>   | 2      | 2      | CAAGGGCGCTTTCTCTGCAC  |
| <i>ACTB</i>   | 2      | 3      | AGCCTCCCGGTTTCCGGGGT  |
| <i>ACTB</i>   | 3      | 1      | GTGGGTGTAGGTACTAACAC  |
| <i>ACTB</i>   | 3      | 2      | TAGAACCTGCAGAGTTCCAA  |
| <i>ACTB</i>   | 3      | 3      | CCTACTTAATACACACTCCA  |
| <i>ACTB</i>   | 5      | 1      | GACAGCTCCCCACACACCAC  |
| <i>ACTB</i>   | 5      | 2      | CTGAGCTGACCTGGGCAGGT  |
| <i>ACTB</i>   | 5      | 3      | CTGCCAGGTCAGCTCAGGC   |
| <i>CANX</i>   | 10     | 1      | TTGCAACTATAAAAAGACTG  |
| <i>CANX</i>   | 10     | 2      | AGATTGTCCAGACTCAGCTG  |
| <i>CANX</i>   | 10     | 3      | TTTATAATCTCTACAAAGAG  |
| <i>CANX</i>   | 12     | 1      | GGCACAATAAACGGCCACTG  |
| <i>CANX</i>   | 12     | 2      | AAAGCTGATTATTGCCCAAG  |
| <i>CANX</i>   | 12     | 3      | TAACTAAGATATGTTGCCTG  |
| <i>CANX</i>   | 14     | 1      | ATGAACCCATCTATGGACAA  |
| <i>CANX</i>   | 14     | 2      | GAGACCAGATTTAGACACAG  |
| <i>CANX</i>   | 14     | 3      | ATACTAAAAGTGCTAGAGGT  |
| donor plasmid | n/a    | n/a    | AAGAGCGAATCGATTTTCGTG |

**Supplemental Table S3.** List of sgRNAs used.

| Gene                     | Intron | Target | Orientation          | Complementary sequence  |
|--------------------------|--------|--------|----------------------|-------------------------|
| <i>ACTB</i>              | 2      | 1      | upstream             | CACCAGGTAGGGGAGCTG      |
| <i>ACTB</i>              | 2      | 1      | downstream           | AGGGTGAGGATGCCTCTCTT    |
| <i>ACTB</i>              | 2      | 2      | upstream             | CACCAGGTAGGGGAGCTG      |
| <i>ACTB</i>              | 2      | 2      | downstream           | AGGGTGAGGATGCCTCTCTT    |
| <i>ACTB</i>              | 2      | 3      | upstream             | CACCAGGTAGGGGAGCTG      |
| <i>ACTB</i>              | 2      | 3      | downstream           | AGGGTGAGGATGCCTCTCTT    |
| <i>ACTB</i>              | 3      | 1      | upstream             | TTGCTTTTTCCCAGATGAGC    |
| <i>ACTB</i>              | 3      | 1      | downstream           | GAACACGGCTAAGTGTGCTG    |
| <i>ACTB</i>              | 3      | 2      | upstream             | GCCCTTTCTCACTGGTTCTCT   |
| <i>ACTB</i>              | 3      | 2      | downstream           | GCTTTACACCAGCCTCATGG    |
| <i>ACTB</i>              | 3      | 3      | upstream             | TTGCTTTTTCCCAGATGAGC    |
| <i>ACTB</i>              | 3      | 3      | downstream           | GAACACGGCTAAGTGTGCTG    |
| <i>ACTB</i>              | 5      | 1      | upstream             | CCCAGCACAATGAAGATCAA    |
| <i>ACTB</i>              | 5      | 1      | downstream           | ACATCTGCTGGAAGGTGGAC    |
| <i>ACTB</i>              | 5      | 2      | upstream             | GACATCCGCAAAGACCTGTA    |
| <i>ACTB</i>              | 5      | 2      | downstream           | GTGAGGACCCTGGATGTGAC    |
| <i>ACTB</i>              | 5      | 3      | upstream             | GACATCCGCAAAGACCTGTA    |
| <i>ACTB</i>              | 5      | 3      | downstream           | GTGAGGACCCTGGATGTGAC    |
| <i>CANX</i>              | 10     | 1      | upstream             | TACCCTGCTCTTGGGTGCTA    |
| <i>CANX</i>              | 10     | 1      | downstream           | AGGCCTAAAGCCTCACAACC    |
| <i>CANX</i>              | 10     | 2      | upstream             | TACCCTGCTCTTGGGTGCTA    |
| <i>CANX</i>              | 10     | 2      | downstream           | AGGCCTAAAGCCTCACAACC    |
| <i>CANX</i>              | 10     | 3      | upstream             | TTAGGCCTCATGCAAAAATG    |
| <i>CANX</i>              | 10     | 3      | downstream           | GCCAAGATCCTGCTGAAATG    |
| <i>CANX</i>              | 12     | 1      | upstream             | ACCAAGCCATGTTTGGTGTT    |
| <i>CANX</i>              | 12     | 1      | downstream           | CAGCAGGCAAAGCTGATTATT   |
| <i>CANX</i>              | 12     | 2      | upstream             | CCAGATGGGAGCAGGATTTA    |
| <i>CANX</i>              | 12     | 2      | downstream           | GAAGGTGAAGGCAGAATGGA    |
| <i>CANX</i>              | 12     | 3      | upstream             | TAGCCCTTCCTGTGTTCTCTG   |
| <i>CANX</i>              | 12     | 3      | downstream           | ACAATAAACGGCCACTGAGG    |
| <i>CANX</i>              | 14     | 1      | upstream             | TTGCCTCTCCTCACTGTGC     |
| <i>CANX</i>              | 14     | 1      | downstream           | ACTGCTCATTGCCTGTTTCC    |
| <i>CANX</i>              | 14     | 2      | upstream             | AGGGTGACAGGAGAGGAACA    |
| <i>CANX</i>              | 14     | 2      | downstream           | GGAAGGCAGAGTTGTAGCTGA   |
| <i>CANX</i>              | 14     | 3      | upstream             | GGAAACAGGCAATGAGCAGT    |
| <i>CANX</i>              | 14     | 3      | downstream           | CACTTACATCCCCATGGAAAA   |
| <i>mNG2<sub>11</sub></i> | n/a    | n/a    | forward              | CTCCTCTCTTCTCCTCTCTCCA  |
| <i>mNG2<sub>11</sub></i> | n/a    | n/a    | reverse              | AACCAATACTTACAGAACTTCCA |
| <i>CANX</i>              | 14     | 1      | upstream (1921 bp)   | TGGCACTGTCAGTCAAGAGG    |
| <i>CANX</i>              | 14     | 1      | downstream (1921 bp) | CGTGGCTTTCTGTTTCTTGG    |

**Supplemental Table S4.** List of DNA primers used. “Orientation” refers to position of the primer binding site relative to the sgRNA target site. “Upstream” primers were mixed with mNG2<sub>11</sub> “reverse” for PCR amplification, and “downstream” primers were mixed with mNG2<sub>11</sub> “forward”.
